# Supplementary material
Source: publisher figshare collection journal article supplement (https://tandf.figshare.com/ndownloader/files/17927051)
Supplement: Supplementary file 1 [file 17927051]

# Analysis of the simulated dataset.

# Load up package
library(rbart)
source("qinsamp.R")


# MCMC settings
burn=1000
nd=2000


# Simulate data
set.seed(27)
n=500
p=1

x = matrix(sort(runif(n*p)),nco=p)
fy = 4*(x[,1]^2)
sigma = .2*exp(2*x[,1])
y = fy+sigma*rnorm(n)

xp = matrix(sort(runif(n*p)),nco=p)
fyp = 4*(xp[,1]^2)
sigmap = .2*exp(2*xp[,1])
yp = fyp+sigmap*rnorm(n)

np=nrow(xp)
# End simulate data


# Now run the heteroscedastic model:
res = rbart(x,y,xp,ntree=200,nskip=burn,ndpost=nd,numcut=1000,k=5,tc=5)
resp = predict.rbart(res,x.test=xp)

# Run the homoscedastic model:
res.homo = rbart(x,y,xp,ntree=200,ntreeh=1,pbd=c(0.7,0.0),nskip=burn,ndpost=nd,numcut=1000,k=2,tc=5)
resp.homo = predict.rbart(res.homo,x.test=xp)


# RMSE
sqrt(mean((yp-resp$mmean)^2))
sqrt(mean((yp-resp.homo$mmean)^2))


# e-statistic
library(energy)
pdraw = resp$mdraws + resp$sdraws * matrix(rnorm(nd*np),nrow=nd)
pdraw.homo = resp.homo$mdraws + resp.homo$sdraws * matrix(rnorm(nd*np),nrow=nd)
qvec = qsamp(yp,pdraw)
qvec.homo = qsamp(yp,pdraw.homo)
edist(matrix(c(qvec,runif(1000)),ncol=1),c(np,1000))
edist(matrix(c(qvec.homo,runif(1000)),ncol=1),c(np,1000))


# Check heter plot
pdf(file="check-heter.pdf",height=8,width=8)
par(mfrow=c(1,1))

oo=order(resp$smean)
qm = apply(resp$sdraws,2,quantile,probs=c(.05,.95))
plot(range(resp$smean),range(qm),type="n",xlab=expression(hat(s)(x)), ylab="s(x) posterior",cex.lab=1.5,cex.axis=1.5)
for(i in 1:np) lines(rep(resp$smean[oo[i]],2),qm[,oo[i]],col="gray")
abline(h=mean(resp.homo$smean[1]),col="black",lwd=3)
abline(h=quantile(resp.homo$sdraws,0.05),col="black",lty=2)
abline(h=quantile(resp.homo$sdraws,0.95),col="black",lty=2)

dev.off()


# Predictive qq-plot
pdf(file="qq-plot.pdf",height=6,width=14)

par(mfrow=c(1,2))
par(mai=c(.9,.9,.5,.5))
set.seed(99)

pdraw = resp$mdraws + resp$sdraws * matrix(rnorm(nd*np),nrow=nd)
qvec = qsamp(yp,pdraw)
qqplot(qvec,runif(10000),col="grey",cex.lab=1.5,xlab="sample quantile",ylab="uniform",cex.axis=1.5)
abline(0,1,col="black",lwd=3)
#title(main="(a) predictive qqplots, heteroscedastic model",cex.main=1.2)

pdrawob = resp.homo$mdraws + resp.homo$sdraws * matrix(rnorm(nd*np),nrow=nd)
qvecob = qsamp(yp,pdrawob)
qqplot(qvecob,runif(10000),col="grey",cex.lab=1.5,xlab="sample quantile",ylab="uniform",cex.axis=1.5)
abline(0,1,col="black",lwd=3)
#title(main="(b) predictive qqplots, homoscedastic model",cex.main=1.2)

dev.off()


# Plug-in qq-plot
pdf(file="qq-plug-in.pdf",height=10,width=12)

qvec = rep(0,n)
for(i in 1:n) {
   qvec[i] = pnorm(y[i],mean=resp$mmean[i],sd=resp$smean[i])
}

qqplot(qvec,runif(10000),col="grey",cex.lab=1.5,xlab="sample quantile",ylab="uniform",cex.axis=1.5)
abline(0,1,col="black",lwd=3)
title(main="plug-in qqplot, heteroscedastic model",cex.main=1.2)

dev.off()


# Data plot
pdf(file="sim-dat.pdf",height=10,width=12)
par(mfrow=c(1,1))

plot(xp,yp,col="grey")
lines(xp,fyp,col="black",lwd=3)
lines(xp,fyp+2*sigmap,col="black",lwd=1,lty=2)
lines(xp,fyp-2*sigmap,col="black",lwd=1,lty=2)

dev.off()


# Plot data, true and point estimates
pdf(file="sim-x2.pdf",height=10,width=12)
par(mfrow=c(1,1))

cexlab=1.5
cexaxis=1.5

#data plus estimated
plot(xp,yp,col="grey",pch=1,cex=.8,cex.axis=1.5,cex.lab=2) #plot data

##true
lines(xp,fyp,col="grey",lwd=3,lty=2) #true f
lines(xp,fyp+2*sigmap,col="grey",lwd=3,lty=2) #true sd
lines(xp,fyp-2*sigmap,col="grey",lwd=3,lty=2) #true sd

##estimated
mfit = resp$mmean
lwde=3
lines(xp,mfit,col="black",lwd=lwde,lty=1) #estimate of f
lines(xp,mfit+2*resp$smean,col="black",lwd=lwde,lty=1) #estimate of sd
lines(xp,mfit-2*resp$smean,col="black",lwd=lwde,lty=1) #estimate of sd

legend("topleft",legend=c("true mean +/- 2sd","estimated"),
                   col = c("grey", "black"),
                   lty=  c(2,        1),
                   lwd=c(3,3))

dev.off()


# Plot mean and standard deviation intervals
pdf(file="sim-x2-intervals.pdf",height=5,width=12)
par(mfrow=c(1,2))
par(mai=c(.8,1.0,.2,.2))
par(oma=c(.8,.8,.2,.2))

rga = range(c(mfit,resp$m.lower,resp$m.upper))
plot(range(xp),rga,xlab="x",ylab="f(x)",cex.lab=cexlab,cex.axis=cexaxis,type="n")
lines(xp,fyp,col="gray",lwd=3,lty=2) #true f
lines(xp,mfit,col="black",lwd=3,lty=1) #estimate of f
lines(xp,resp$m.lower,lwd=lwde,lty=4,col="black")
lines(xp,resp$m.upper,lwd=lwde,lty=4,col="black")

legend("topleft",legend=c("true mean","estimated mean","95% interval"),
                      lty=c(2,1,4),
                      col=c("gray","black","black"),
                      lwd=c(3,3,3))

sfit = resp$smean
rga = range(c(sfit,resp$s.lower,resp$s.upper))
plot(range(xp),rga,xlab="x",ylab="s(x)",cex.lab=cexlab,cex.axis=cexaxis,type="n")
lines(xp,sigmap,col="gray",lwd=3,lty=2) #true sigma
lines(xp,sfit,col="black",lwd=3,lty=1) #estimate of f
lines(xp,resp$s.lower,lwd=lwde,lty=4,col="black")
lines(xp,resp$s.upper,lwd=lwde,lty=4,col="black")

legend("topleft",legend=c("true standev","estimated standev","95% interval"),
                      lty=c(2,1,4),
                      col=c("gray","black","black"),
                      lwd=c(3,3,3))


dev.off()
